# Supplementary material for: Crystallization Behavior of Poly(ε-Caprolactone)-Hollow Glass Microspheres Composites for Rotational Molding Technology
Source: MDPI journal article supplement (doi:10.3390/polym14204326), 2022-10-14
Supplement: s1 [file s1]

## Supplementary materials

# Crystallization behavior of poly( $\epsilon$ -caprolactone)-hollow glass microspheres composites for rotational molding technology

Adriano Vignali <sup>1,\*</sup>, Roberto Utzeri <sup>2</sup>, Maurizio Canetti <sup>1</sup> and Fabio Bertini <sup>1</sup>

<sup>1</sup> Istituto di Scienze e Tecnologie Chimiche "Giulio Natta" (SCITEC) – CNR, Via A. Corti 12, 20133 Milano, Italy

<sup>2</sup> Istituto di Scienze e Tecnologie Chimiche "Giulio Natta" (SCITEC) – CNR, Via De Marini 6, 16149 Genova, Italy

\* Correspondence: [adriano.vignali@scitec.cnr.it](mailto:adriano.vignali@scitec.cnr.it)

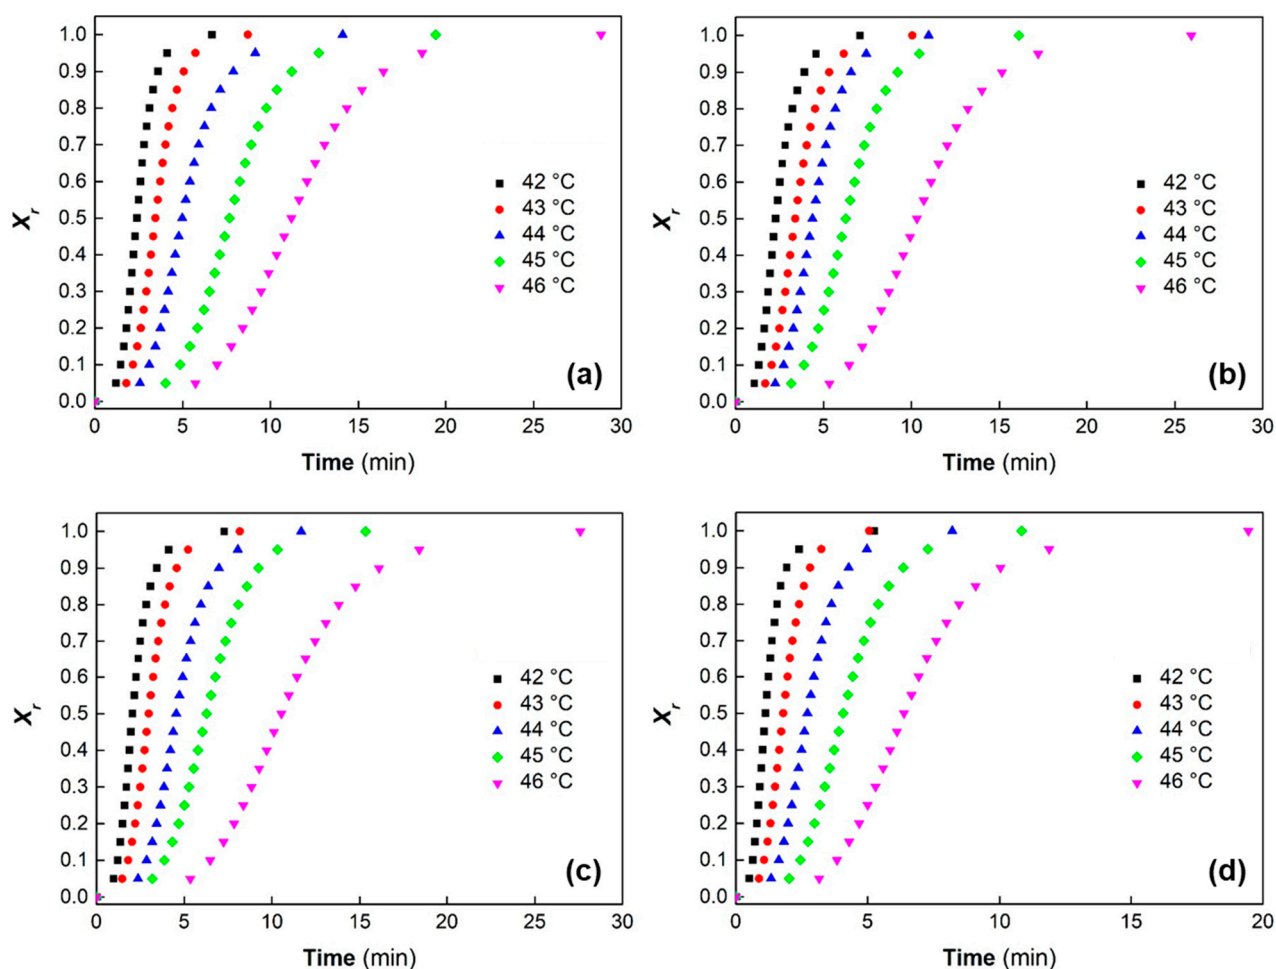

**Figure S1.** Evolution of relative crystallinity as a function of time for PCL-HGM15 (a), PCL-HGM20 (b), PCL-HGM25 (c) and PCL-HGMf20 (d) under isothermal conditions at different  $T_c$ .

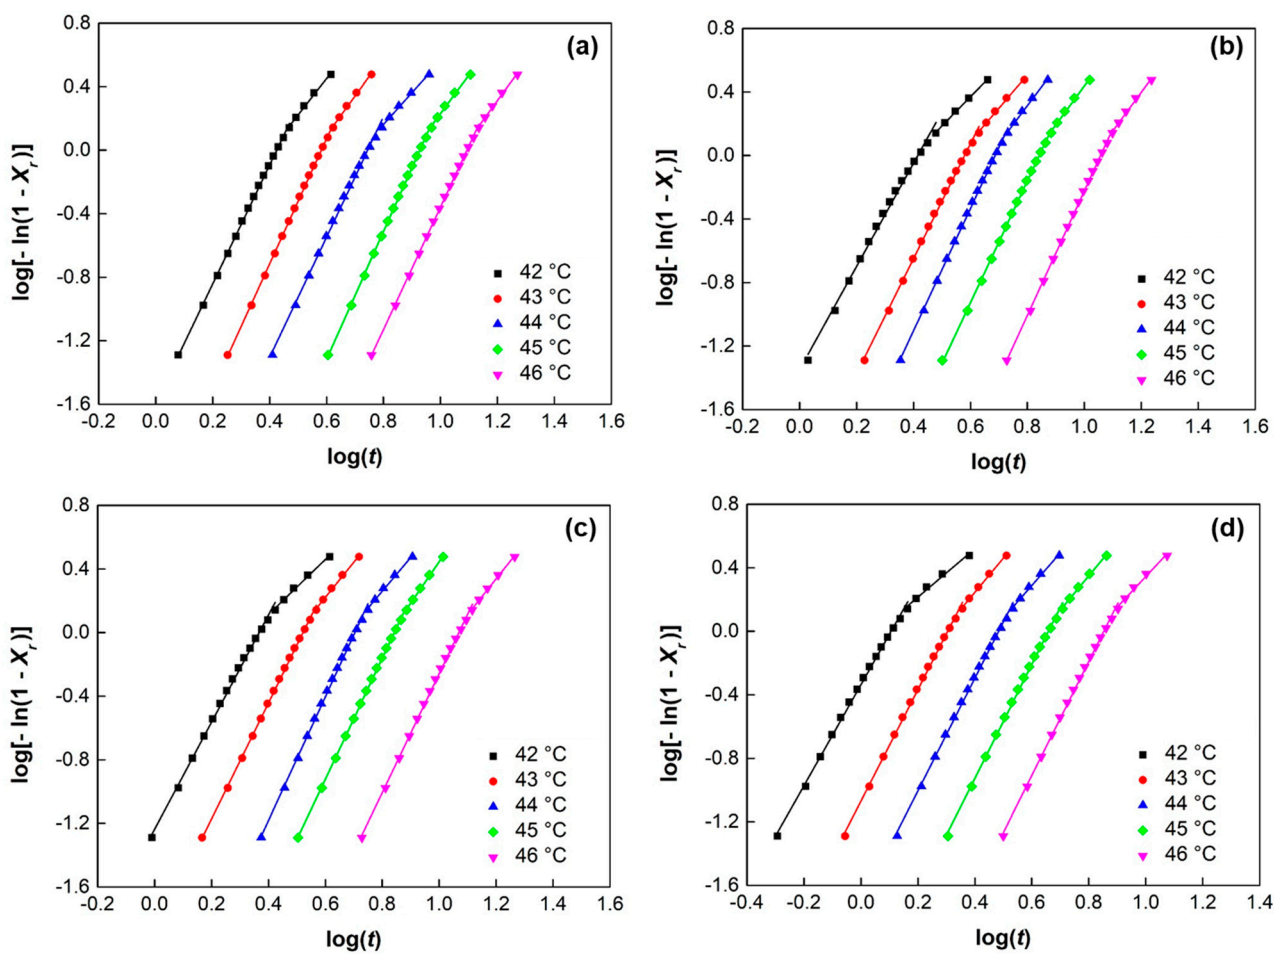

**Figure S2.** Plots of  $\log[-\ln(1 - X_r)]$  vs.  $\log t$  for isothermal crystallization of PCL-HGM15 (a), PCL-HGM20 (b), PCL-HGM25 (c) and PCL-HGMf20 (d) at different  $T_c$ .
